# Supplementary material for: A Novel Approach to Measure Executive Functions in Students: An Evaluation of Two Child-Friendly Apps
Source: Front Psychol. 2020 Jul 16;11:1702. doi: 10.3389/fpsyg.2020.01702 (PMC7378958; doi:10.3389/fpsyg.2020.01702)
Supplement: Supplementary file 2 [file Table_2.XLSX]

## Sheet: EFTasksData
StudentID	Age	Gender	EYTInhibition	eFunInhibition	eFunWM	EYTWM	eFunCF	EYTCF	EnglishGrade	HASSGrade	MathGrade	ScienceGrade	DesignAndTechGrade	DigitalTechGrade
35344	8	0	0.962963	0.8176	20	5	0	12	2	3	2	3	3	3
35879	7.8	1	0.852222	0.960356	16	2.33333	0.25	12	4	4	4	4	4	4
36008	7.6	0	1	0.88	25	2.66667	0.181818	12	3	3	3	4	3	3
36010	7.6	0		0.748267	3	2.66667	0.3	8	3	4	4	4	3	4
36154	7.4	1	1	0.986667	16	4.33333	0.111111	11	4	4	4	4	4	4
36409	7.8	0	0.72993	0.656356	20	2.33333	0.25	10	2	2	2	2	3	3
36518	7.3	1	0.549147	0.686933	12	4.33333	0.2	4	2	2	2	3	3	2
36611	7.2	1	0.65731	0.647111	0	3.33333	0.272727	11	3	3	2	3	3	3
36913	7.2	0	0.883333	0.820444	20	1.33333	0	10	2	2	2	2	2	2
36933	7.5	1	0.808889	0.894578	0	3	0.5	9	1	2	1	2	2	2
37244	7.1	1	0.823333	0.668978	3	2.33333	0.333333	9	2	2	2	2	2	2
37363	7.6	0	0.966667	0.749867	20	0.333333	0.333333	12	3	2	3	3	2	3
37428	7.4	1	1	0.778667	35	3	0.1	12	2	2	2	3	3	2
37655	7.1	1	0.983333	0.622933	20	4.33333	0.333333	9	3	3	3	3	3	2
37986	7	0	0.800247	0.736	30	2.33333	0.6	11	2	2	2	2	2	2
38003	8.3	0	0.966667	0.721778	16	2.33333	0.142857	10	2	2	2	3	2	2
38241	6.6	0	0.933333	0.647111	35	4.66667	0.363636	11	4	3	4	3	3	3
38402	6.6	1	0.835413	0.583644	16	3.33333	0.125	5	2	2	3	2	2	2
38416	6.9	0	0.786511	0.763022	3	2.66667	0.5	9	2	2	2	2	2	3
38530	7.4	1	0.837778	0.7728	35	5.66667	0.1	11	4	4	4	4	4	3
38568	6.6	1	0.703977	0.7008	16	4.33333	0.272727	12	4	4	4	3	3	4
38616	6.8	1	0.751111	0.856533	24	3	0.2	10	2	2	2	2	3	3
38690	6.5	0	0.983333	0.8288	6	3	0.125	9	3	3	3	3	3	3
38937	7.7	0	1	0.947378	20	2	0	11	3	3	3	4	3	3
38953	7	1	0.801975	0.7104	3	2.33333	0.1	12	2	2	2	2	2	2
39079	6.5	0	0.886667	0.7808	16	3	0.555556	0	2	2	2	2	2	3
39226	6.7	0	0.786667	0.736711	12	3	0	11	3	4	4	3	3	4
39275	7.4	1	0.25809	0.843556	20	1.66667	0.111111	4	3	3	3	3	3	3
39278	7.7	0	0.774594	0.933333	45	2	0	8	2	2	2	2	2	2
39315	6.6	0	0.765556	0.933333	30	2	0	11	2	2	2	2	2	3
39622	7.6	1	0.74386	0.906667	20	3.33333	0.333333	10	2	2	2	2	3	2
39779	6.6	0	0.759298	0.813333	20	3.66667	0.125	6	2	2	2	2	2	2
39959	5.11	1	0.762222	0.6912	6	1	0.6	9	2	2	2	2	2	2
40089	6.6	1	0.772632	0.776178	16	3	0.125	12	2	3	3	3	3	3
40165	6.2	1	0.983333	0.84	20	2.66667	0	9	2	3	3	2	2	2
40390	7.6	0	0.84	0.8704	66	4	0.363636	11	4	4	4	4	4	4
40471	6.11	1	0.721111	0.584889	24	2.33333	0.3	12	2	2	2	3	3	2
41014	7	1	0.95	0.858311	25	4	0.166667	12	2	3	2	3	2	2
41064	7.6	0	0.73193	0.757333	20	3.33333	0.7	4	4	4	4	4	4	4
41159	7.8	0	0.794444	0.934044	54	2.33333	0.333333	10	2	3	2	3	2	2
41296	6.7	1	0.885848	0.704	16	1.66667	0.1	11	2	2	2	2	2	2
41542	5.11	1	0.869474	0.907733	9	3	0.25	4	4	2	3	2	2	2
42270	7.1	0	0.965789	0.893333	12	3	0.857143	8	2	2	2	2	2	2
42318	7	0	0.84	0.845689	20	0	0	11	2	2	2	2	2	2
42440	6.2	1	0.696667	0.8176	8	1	0.375	10	1	1	1	2	2	2
42756	7.9	0	0.696667	0.796444	25	2.33333	0.0909091	11	2	2	2	2	2	2
42939	5.11	0	0.84	0.782578	16	3	0.625	4	2	2	2	2	2	2
43040	6.2	1	0.839181	0.678933	0	2.33333	0.142857	7	2	3	2	3	2	2
43133	6.5	0	0.898246	0.882489	16	1.33333	0.4	9	1	1	1	1	2	2
43159	6.6	1	0.954751	0.7952	12	2.33333	0.333333	9	3	2	2	3	2	3
43661	7.5	1	0.71501	0.7552	16	3.66667	0.0909091	11	3	3	3	3	3	3
45766	7.7	1	0.582173		20	4.33333	0.166667	11	3	3	3	3	3	3
47846	7.4	0	0.726471	0.869511	16	2.66667	0.181818	9	4	4	4	4	3	4
49993	6.3	0	0.828947	0.7952	12	1.33333	0.5	12	2	2	2	2	2	2
52581	5.11	0	0.572515	0.776178	0	1.33333	0	11	2	2	1	3	2	2
52760	6.9	0	0.707778	0.906667	25	2.66667	0.333333	6	2	2	2	2	2	3
52793	6.1	1		0.843556	12	2.66667	0.375	8	2	2	2	2	2	2
53157	6.7	1	0.660556	0.84	12	2	0.272727	10	2	2	1	2	2	2
53358	7.8	0	0.85	0.618311	9	3	0.375	8	3	3	4	4	3	3
53441	7.1	1	0.916667	0.555378	16	2	0.1	9	3	3	3	3	3	3
53570	7.2	1	0.85	0.719467	20	3	0	10	1	2	1	2	2	2
54090	6.9	1	0.883333	0.9344	20	1.33333	0.222222	11	2	2	2	2	2	2
54360	8.2	1	0.966667	0.786667	8	3.66667	0.2	11	3	3	2	3	3	2
54442	8.1	1	0.983333	0.771556	20	2	0.1	9	2	2	1	2	2	2
54443	6.11	1	0.933333	0.769956	3	2	0.222222	9	2	2	1	2	2	2
54610	7.5	0		0.744711	35	2	0.4	12	3	3	4	3	3	3
54657	6.4	1	0.870292	0.752711	20	2	0.363636	10	4	3	3	3	3	3
54878	7.2	0	0.624383	0.973511	16	3.66667	0.2	5	2	2	3	2	3	2
54934	6.9	1	0.883333	0.921422	9	0	0.222222	8	2	3	2	3	3	2
55553	6.4	1	0.833333	0.986667	3	1.33333	0	4	3	2	3	3	3	2
55689	6.3	0	0.855556	0.427556	6	1.33333	0.4	9	1	2	1	1	2	2
